# Supplementary material
Source: MDPI journal article supplement (https://www.mdpi.com/2073-4441/14/7/1163)
Supplement: s1 [file s1 › water-1613267-supplementary.pdf]

Article

# Thermodynamic Study of Phosphate Adsorption and Removal from Water onto Iron Oxyhydroxides

Kyriaki Kalaitzidou <sup>1,\*</sup>, Anastasios Zouboulis <sup>2</sup> and Manassis Mitrakas <sup>1</sup>

<sup>1</sup> Department of Chemical Engineering, School of Engineering, Aristotle University of Thessaloniki, Thessaloniki, Greece; mmitraka@auth.gr (M.M.)

<sup>2</sup> Department of Chemistry, School of Sciences, Aristotle University of Thessaloniki, Thessaloniki, Greece; zoubouli@chem.auth.gr (A.Z.)

\* Correspondence: kalaitzidou@cheng.auth.gr (K.K.)

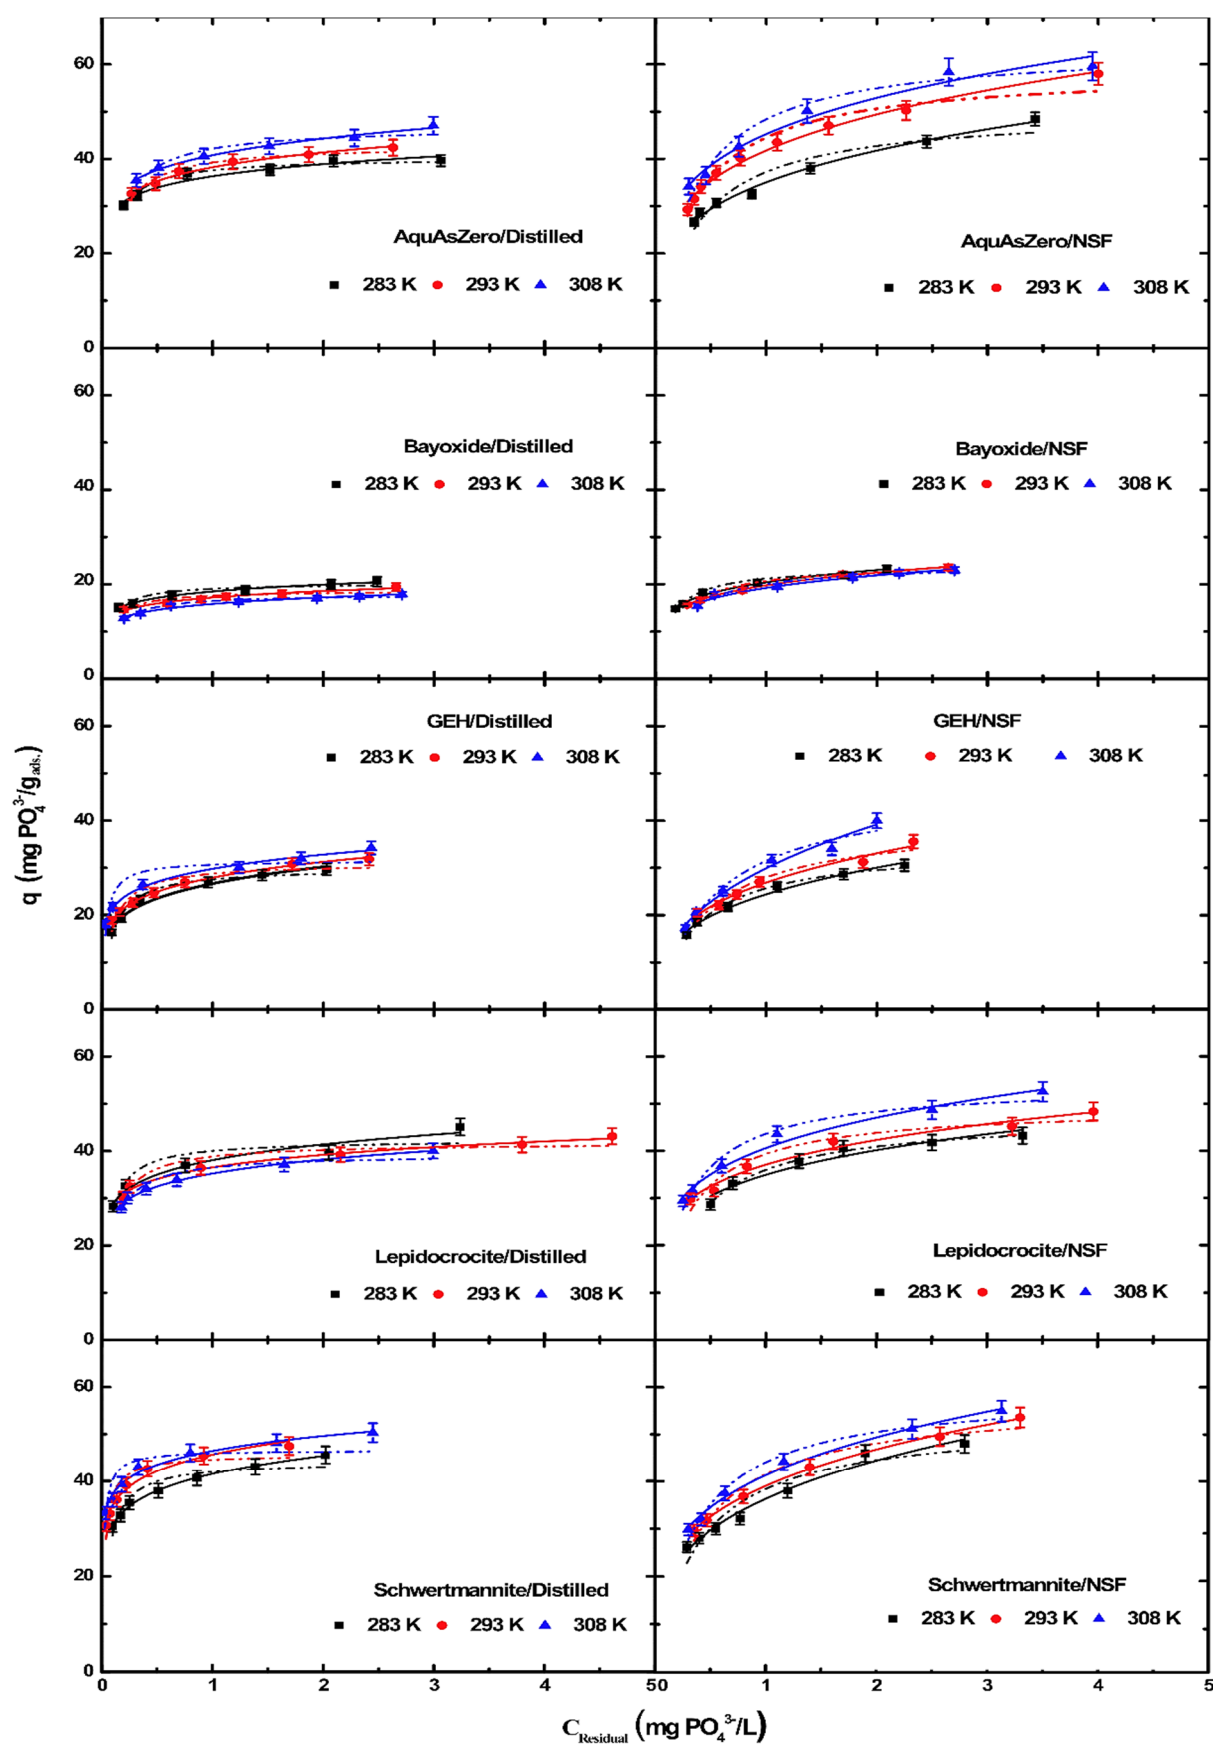

**Figure S1.** Phosphate adsorption isotherms at pH value 7, fitted by Freundlich (—), or Langmuir main adsorption models (---).
